# Supplementary material for: Needs analysis of parents following sudden cardiac death in the young
Source: PubMed Central journal article supplement — Open Heart. 2020 Jul 23;7(2):e001120. doi: 10.1136/openhrt-2019-001120 (PMC7380729; doi:10.1136/openhrt-2019-001120), 2020-07-23
Supplement: openhrt-2019-001120supp001.pdf [file openhrt-2019-001120supp001.pdf]

McDonald K et al. Supplementary Material

**SUPPLEMENTARY TABLE 1: Needs Survey Items**

| Item                                                                                                            | Domain  | Need - Yes (%) | High (%)   | Mod (%)   | Low (%)   | Unmet (%)  |
|-----------------------------------------------------------------------------------------------------------------|---------|----------------|------------|-----------|-----------|------------|
| To have the option of whether or not you would pursue genetic testing for yourself or family members?           | Medical | 18/19 (95)     | 14/18 (78) | 2/18 (11) | 2/18 (11) | 4/18 (33)  |
| To understand what had happened?                                                                                | Medical | 35/37 (95)     | 33/36 (92) | 2/36 (6)  | 1/36 (3)  | 21/35 (60) |
| For the coroner and their office to give you honest and accurate information?                                   | Medical | 34/37 (92)     | 27/35 (77) | 4/35 (11) | 4/35 (11) | 9/34 (26)  |
| To understand the medical cause of your child's death                                                           | Medical | 34/37 (92)     | 31/35 (89) | 2/35 (6)  | 2/35 (6)  | 15/25 (43) |
| For medical professionals to give you honest and accurate information?                                          | Medical | 34/38 (89)     | 25/34 (74) | 6/34 (18) | 3/34 (9)  | 6/32 (19)  |
| To understand the possibility of an inherited problem immediately after your child's death?                     | Medical | 33/38 (87)     | 23/32 (72) | 6/32 (19) | 3/32 (9)  | 7/33 (21)  |
| For medical professionals to provide you with the opportunity to ask questions about your child's death?        | Medical | 33/38 (87)     | 28/33 (85) | 4/33 (12) | 1/33 (3)  | 22/32 (69) |
| To have the opportunity to see your child following their death?                                                | Medical | 32/38 (84)     | 28/32 (88) | 3/32 (9)  | 1/32 (3)  | 5/32 (16)  |
| For the coroner and their office to treat you in a respectful and compassionate way, and acknowledge your loss? | Medical | 31/37 (84)     | 23/32 (72) | 7/32 (22) | 2/32 (6)  | 10/31 (32) |
| For information about the benefits and risks of genetic testing for yourself and other family members?          | Medical | 15/18 (84)     | 14/15 (93) | 1/15 (7)  | 0/15 (0)  | 4/15 (27)  |
| To have your general practitioner informed about findings from specialists?                                     | Medical | 30/37 (81)     | 19/30 (63) | 7/30 (23) | 4/30 (13) | 8/28 (29)  |
| For information about what my child's death means for the health of my family?                                  | Medical | 30/38 (79)     | 26/31 (84) | 3/31 (10) | 2/31 (6)  | 9/31 (29)  |
| For first responders (e.g. police and paramedics) to give you honest and accurate information?                  | Medical | 28/36 (78)     | 22/28 (79) | 2/28 (7)  | 4/28 (14) | 7/28 (25)  |
| For an opportunity immediately after your child's death to discuss your feelings with a medical professional?   | Medical | 29/38 (76)     | 22/29 (76) | 6/29 (21) | 1/29 (3)  | 10/28 (36) |
| For the medical professionals to treat you in a respectful and compassionate way, and acknowledge your loss?    | Medical | 29/38 (76)     | 20/29 (69) | 6/29 (21) | 3/29 (10) | 6/28 (21)  |

|                                                                                                                                   |         |            |            |            |            |            |
|-----------------------------------------------------------------------------------------------------------------------------------|---------|------------|------------|------------|------------|------------|
| To be informed of test results in a timely manner?                                                                                | Medical | 28/38 (74) | 22/27 (81) | 5/27 (19)  | 0/27 (0)   | 8/27 (30)  |
| To be directed to information about specialist clinics and professionals?                                                         | Medical | 28/38 (74) | 18/28 (64) | 8/28 (29)  | 2/28 (7)   | 9/28 (32)  |
| To understand the genetic cause of your child's death?                                                                            | Medical | 26/36 (72) | 18/28 (64) | 8/28 (29)  | 1/27 (4)   | 18/27 (67) |
| For you and your family to receive follow-up medical care?                                                                        | Medical | 27/38 (71) | 0/27 (0)   | 6/27 (22)  | 21/27 (78) | 3/27 (11)  |
| For first responders (e.g. police and paramedics) to treat you in a respectful and compassionate way, and acknowledge your loss?  | Medical | 27/38 (71) | 21/27 (78) | 3/27 (11)  | 3/27 (11)  | 8/27 (30)  |
| For an explanation of the genetic testing options available to you?                                                               | Medical | 26/37 (70) | 13/24 (54) | 9/24 (38)  | 2/24 (8)   | 6/25 (24)  |
| For advice about medical and/or heart health and any restrictions that may need to be put in place?                               | Medical | 26/37 (70) | 18/26 (69) | 6/26 (23)  | 2/26 (8)   | 2/26 (8)   |
| For referral to a cardiac specialist?                                                                                             | Medical | 26/37 (70) | 19/25 (76) | 4/25 (16)  | 2/25 (8)   | 2/26 (8)   |
| For information about medical care if you carry the gene variant?                                                                 | Medical | 13/19 (68) | 9/13 (69)  | 4/13 (31)  | 0/13 (0)   | 5/12 (42)  |
| For a health professional to discuss the signs of cardiac problems and when you should be concerned?                              | Medical | 26/38 (68) | 16/26 (62) | 10/26 (38) | 0/26 (0)   | 6/27 (22)  |
| For professional support in dealing with the worry that there may be an underlying problem even if the cause of death is unclear? | Medical | 25/38 (66) | 19/24 (79) | 3/24 (13)  | 2/24 (8)   | 11/25 (44) |
| For an explanation from a health professional about how the heart works as relevant to your child's condition?                    | Medical | 25/38 (66) | 19/24 (79) | 5/24 (21)  | 0/24 (0)   | 11/25 (44) |
| For an explanation of the genetic testing options available to you and the process involved?                                      | Medical | 24/37 (65) | 15/24 (63) | 6/24 (25)  | 3/24 (13)  | 7/24 (29)  |
| For information about the reliability and accuracy of genetic testing?                                                            | Medical | 12/19 (63) | 8/12 (67)  | 4/12 (33)  | 0/12 (0)   | 4/12 (33)  |
| To have the opportunity to make decisions about how your child's body was treated during the autopsy process?                     | Medical | 23/38 (61) | 20/24 (83) | 3/24 (13)  | 1/24 (4)   | 12/24 (50) |
| For medical professionals to provide written information in terms that you could understand?                                      | Medical | 23/38 (61) | 17/23 (74) | 5/23 (22)  | 1/23 (4)   | 13/23 (56) |
| For health professionals to be more comfortable using your child's name?                                                          | Medical | 18/38 (47) | 14/17 (82) | 3/17 (18)  | 0/17 (0)   | 5/17 (29)  |
| For referral to a genetic counsellor?                                                                                             | Medical | 15/37 (41) | 13/15 (87) | 1/15 (7)   | 1/15 (7)   | 4/16 (25)  |

|                                                                                                                                                             |               |            |            |           |           |            |
|-------------------------------------------------------------------------------------------------------------------------------------------------------------|---------------|------------|------------|-----------|-----------|------------|
| For support and information to understand possible genetic guilt (feelings around having unknowingly passed on a faulty gene to your child)?                | Medical       | 14/38 (37) | 11/14 (79) | 1/14 (7)  | 2/14 (15) | 8/14 (51)  |
| For support for dealing with uncertainty when waiting for test results to arrive?                                                                           | Medical       | 12/38 (32) | 8/12 (67)  | 4/12 (33) | 0/12 (0)  | 5/12 (42)  |
| For information about the confidentiality of genetic testing?                                                                                               | Medical       | 5/19 (26)  | 2/5 (40)   | 2/5 (40)  | 1/5 (20)  | 1/5 (20)   |
| For support from your family?                                                                                                                               | Psychological | 34/38 (89) | 24/34 (74) | 8/34 (24) | 1/34 (3)  | 11/34 (32) |
| For access to professional counselling or psychological services to deal with your bereavement?                                                             | Psychological | 28/38 (74) | 20/28 (71) | 7/28 (25) | 1/28 (4)  | 11/27 (41) |
| For family/friends to be more comfortable using your child's name?                                                                                          | Psychological | 22/38 (58) | 17/22 (77) | 5/22 (23) | 0/22 (0)  | 9/21 (43)  |
| For professional support in dealing with the long-term difficulties resulting from the death of your child?                                                 | Psychological | 19/38 (50) | 13/19 (68) | 5/19 (26) | 1/19 (5)  | 10/18 (56) |
| For access to talk to other parents who have lost a child?                                                                                                  | Psychological | 18/38 (47) | 8/18 (44)  | 8/18 (44) | 2/18 (11) | 11/18 (61) |
| For support from your community?                                                                                                                            | Psychological | 17/38 (45) | 7/17 (41)  | 8/17 (47) | 2/17 (12) | 7/18 (39)  |
| For a health professional or resources to help you manage the reactions of others?                                                                          | Psychological | 17/38 (45) | 14/17 (82) | 2/17 (12) | 1/17 (6)  | 9/17 (53)  |
| For referral to someone to talk to who understands and has been through a similar experience?                                                               | Psychological | 16/38 (42) | 11/16 (69) | 4/16 (25) | 1/16 (6)  | 11/16 (69) |
| For a health professional or resources to help you deal with people who did not know what to say or how to behave?                                          | Psychological | 16/38 (42) | 11/16 (69) | 3/16 (19) | 2/16 (13) | 10/16 (63) |
| For a health professional or resources to provide you with advice for dealing with people who expected you to be "back to normal" after your child's death? | Psychological | 16/38 (42) | 13/16 (81) | 3/16 (19) | 0/16 (0)  | 12/16 (75) |
| For referral to a support group of parents who have been through a similar experience?                                                                      | Psychological | 13/38 (34) | 9/13 (69)  | 4/13 (31) | 0/13 (0)  | 9/13 (69)  |
| For access to someone who could look after your spiritual needs?                                                                                            | Spiritual     | 17/37 (46) | 8/17 (47)  | 8/17 (47) | 1/17 (6)  | 6/16 (38)  |
| To receive help/advice for taking care of your child's financial matters after death (e.g. closing bank accounts, paying/finalising bills etc)?             | Financial     | 13/38 (34) | 8/13 (62)  | 4/13 (31) | 1/13 (8)  | 5/13 (38)  |
